# Supplementary material for: Perforated Hydrogels Consisting of Cholesterol-Bearing Pullulan (CHP) Nanogels: A Newly Designed Scaffold for Bone Regeneration Induced by RANKL-Binding Peptides and BMP-2
Source: MDPI journal article supplement (doi:10.3390/ijms23147768), 2022-07-14
Supplement: s1 [file s1]

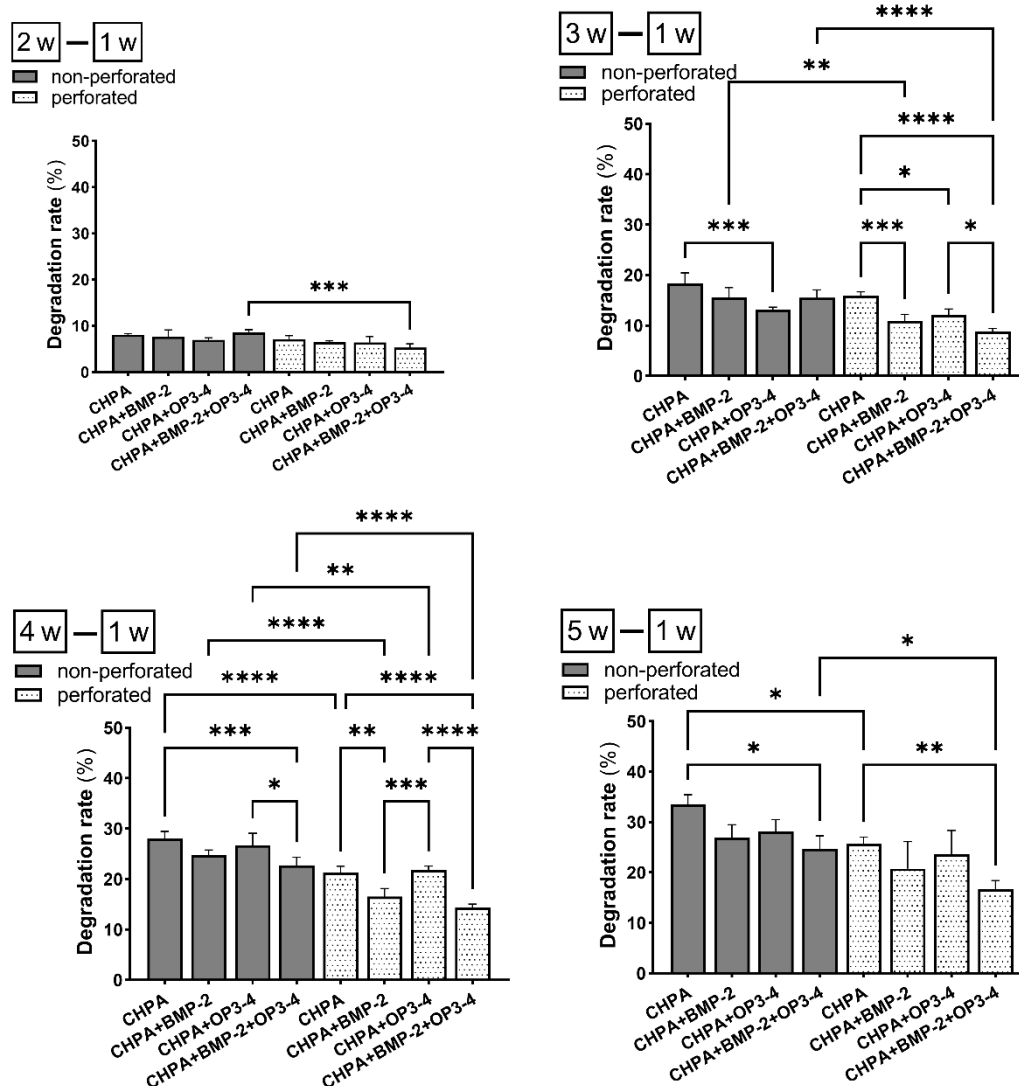

**Supplementary Figure S1. The time-course analyses of the degradation rate of CHPA scaffold.** Quantitative data of the degradation rate of the two differently designed scaffolds. The percentage reduction of scaffold material was calculated by taking the fluorescent area at week 1 as 100% and subtracting the fluorescent area percentage every week and calculated as described in the Materials and Methods. See the Figure 2 legends regarding the group names. The comparisons between groups were analyzed by the ANOVA and Tukey HSD test. Values are expressed as the mean  $\pm$  SD, \* $p < 0.05$ , \*\* $p < 0.01$ , \*\*\* $p < 0.001$ , \*\*\*\* $p < 0.0001$ .

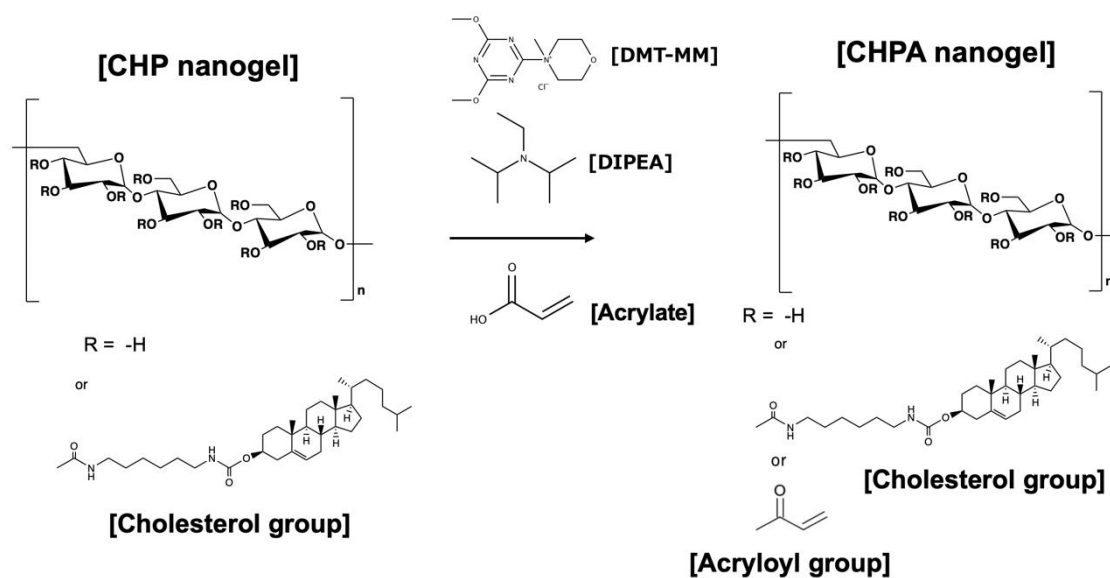

**Supplementary Figure S2. Synthesis route of CHPA nanogels.**

CHP: cholesterol-bearing pullulan nanogel

DMT-MM: 4-(4,6-dimethoxy-1,3,5-triazin-2-yl)-4-methyl-morpholinium chloride

DIPEA: N,N-diisopropylethylamine, and acrylic acid
